# Supplementary material for: The spatial segregation of pericentric cohesin and condensin in the mitotic spindle
Source: PubMed Central journal article supplement — Mol Biol Cell. 2013 Dec 15;24(24):3909–19. doi: 10.1091/mbc.E13-06-0325 (PMC3861086; doi:10.1091/mbc.e13-06-0325), 2013-12-15

# Supplemental Materials

*Molecular Biology of the Cell*

Stephens et al.

**Supplemental Figure 1.** Condensin clustering/heterogeneity is retained in *sir2Δ* and *mcm21Δ* cells. (A) Percentage of cells showing Smc4-GFP fluorescence as a focus, two foci, or uniform signal in *sir2Δ* cells compared to WT and simulations of clustering. Heterogeneity did not significantly change in *sir2Δ* cells in which condensin remained spindle proximal (n = 55,  $\chi^2 = 0.09$ ; 39 % focus, 30% two foci, 31% uniform). (B) Percentage of cells showing Smc4-GFP fluorescence as a focus, two foci, or uniform signal in *mcm21Δ* (n = 44) compared to simulations of clustering in an extended condensin cylinder. The condensin cylinder length was increased by 500 nm to match the increased interkinetochore lengths in *mcm21Δ* cells. The frequency of fluorescent classifications best match simulations of clustering, suggesting there is no change in condensin's ability to cluster in *mcm21Δ* cells ( $\chi^2 = 0.46$  vs. simulation of 8 condensin per cluster).

# Supplemental Figure 1

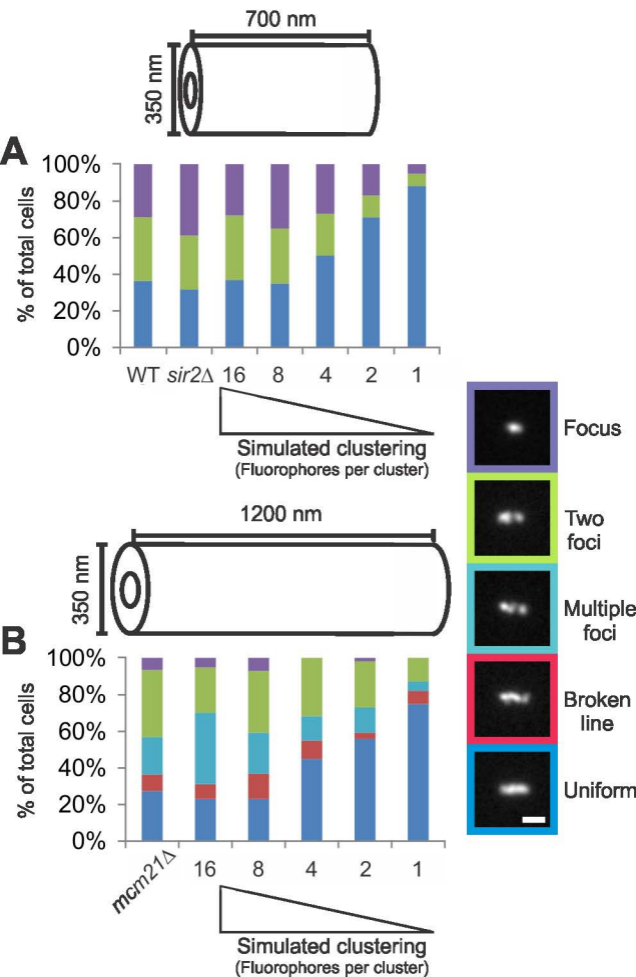

Supplement: supp_E13-06-0325v1_CombinedSupMats.pdf [file supp_E13-06-0325v1_CombinedSupMats.pdf]
